# Supplementary material for: Implementation of a Large-Scale Ebola Vaccination Campaign in Rwanda
Source: MDPI journal article supplement (doi:10.3390/vaccines14070588), 2026-07-01
Supplement: s1 [file Supplement Table S1_UMURINZI TOTAL PARTICIPANT VACCINATED BY SITE.pdf › Supplement Table S1_UMURINZI TOTAL PARTICIPANT VACCINATED BY SITE.pdf]

**Supplement Table S1: UMURINZI TOTAL PARTICIPANTS VACCINATED BY SITE**

| 1 <sup>st</sup> dose vaccination sites | Received 1 <sup>st</sup> dose | Attended 2 <sup>nd</sup> dose visit | Received 2 <sup>nd</sup> dose | Adherence %  |
|----------------------------------------|-------------------------------|-------------------------------------|-------------------------------|--------------|
| <b><u>Rubavu District</u></b>          |                               |                                     |                               |              |
| Kigufi HC                              | 31,958                        | 29,733                              | 29,729                        | 93.0%        |
| Rugerero HC                            | 17,405                        | 15,901                              | 15,869                        | 91.2%        |
| Cyanzarwe HC                           | 13,118                        | 11,789                              | 11,765                        | 89.7%        |
| Byahi HC                               | 12,526                        | 11,183                              | 11,180                        | 89.3%        |
| Poids Lourds                           | 11,598                        | 10,045                              | 10,025                        | 86.4%        |
| Busasamana HC                          | 9,423                         | 8,626                               | 8,599                         | 91.3%        |
| Gacuba II HC                           | 8,196                         | 7,602                               | 7,594                         | 92.7%        |
| La Corniche                            | 1,196                         | 855                                 | 855                           | 71.5%        |
| <b><u>Kigali Mobile Kanombe</u></b>    | 870                           | 858                                 | 856                           | 98.4%        |
| <b><u>Rusizi District</u></b>          |                               |                                     |                               |              |
| Islamic HC                             | 43,204                        | 42,418                              | 42,277                        | 97.9%        |
| Gihundwe HC                            | 15,305                        | 14,673                              | 14,624                        | 95.9%        |
| Nkombo HC                              | 14,399                        | 14,157                              | 14,119                        | 98.1%        |
| Mt Cyangugu HC                         | 8,434                         | 7,953                               | 7,914                         | 93.8%        |
| Nkanka HC                              | 16,639                        | 16,368                              | 16,291                        | 97.9%        |
| Nyakarenzo HC                          | 11,837                        | 11,673                              | 11,606                        | 98.0%        |
| <b><u>Total</u></b>                    | <b>216,108</b>                | <b>203,834</b>                      | <b>203303</b>                 | <b>94.1%</b> |

HC: Health Center
