# Supplementary figures and images for: Implementation of a Large-Scale Ebola Vaccination Campaign in Rwanda
Source: MDPI journal article supplement (doi:10.3390/vaccines14070588), 2026-07-01

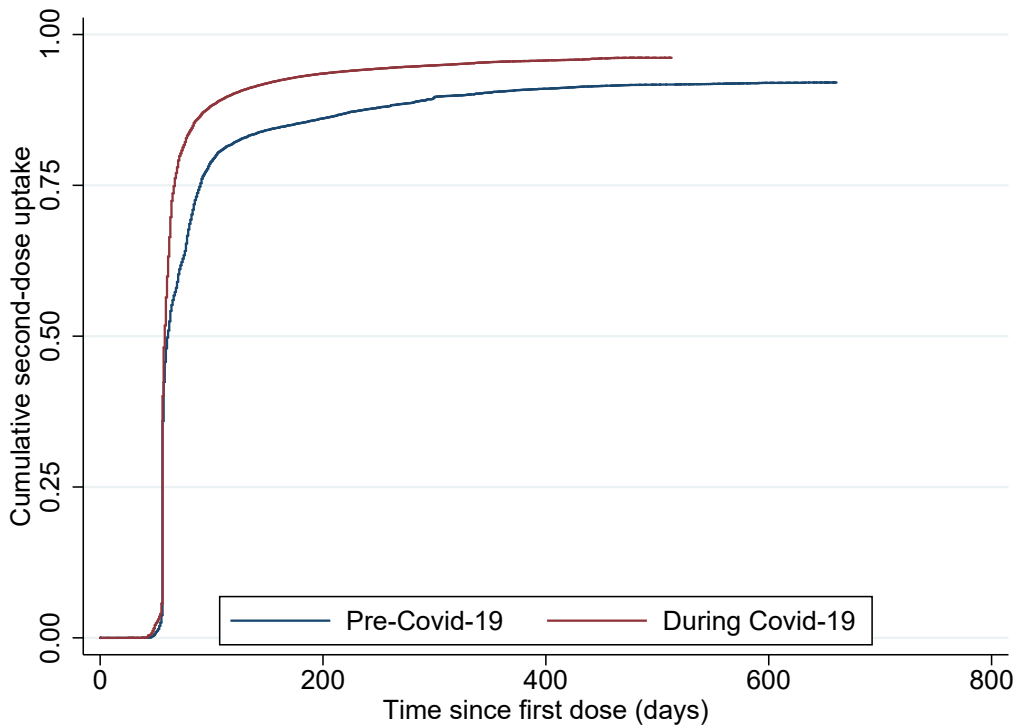

Supplement: s1 [file Figure S1. Kaplan Meier with Covid-19 period.pdf › Figure S1. Kaplan Meier with Covid-19 period.pdf]
